# Supplementary material
Source: publisher figshare collection journal article supplement (https://asha.figshare.com/articles/dataset/_/24061017)
Supplement: Supplementary file [file 1]

Supplemental Material S1. Correlations between all variables across all participants.

|                 |                     | age                | education | MMSE               | #correct            | #cluster_H1         | #cluster_LN         | #cluster_H2         | cluster size_H1     | cluster size_LN     | cluster size_H2     | #switch_H1         | #switch_LN         | #switch_H2         | %cluster_H1         | %cluster_LN         | %cluster_H2        | %switch_H1          | %switch_LN          | %switch_H2          |
|-----------------|---------------------|--------------------|-----------|--------------------|---------------------|---------------------|---------------------|---------------------|---------------------|---------------------|---------------------|--------------------|--------------------|--------------------|---------------------|---------------------|--------------------|---------------------|---------------------|---------------------|
| age             | Pearson Correlation | 1                  | −.082     | −.321 <sup>*</sup> | −.124               | −.129               | −.081               | −.141               | .065                | .035                | −.009               | −.056              | −.012              | .036               | −.026               | .154                | .008               | .032                | −.003               | .119                |
|                 | Sig. (2-tailed)     |                    | .619      | .046               | .452                | .435                | .622                | .392                | .696                | .834                | .954                | .737               | .942               | .828               | .877                | .349                | .963               | .848                | .983                | .469                |
|                 | <i>N</i>            | 39                 | 39        | 39                 | 39                  | 39                  | 39                  | 39                  | 39                  | 39                  | 39                  | 39                 | 39                 | 39                 | 39                  | 39                  | 39                 | 39                  | 39                  | 39                  |
| education       | Pearson Correlation | −.082              | 1         | −.131              | −.080               | .047                | .072                | .054                | −.207               | −.225               | −.281               | −.079              | −.119              | −.140              | −.088               | −.085               | −.073              | .050                | .039                | .019                |
|                 | Sig. (2-tailed)     | .619               |           | .425               | .629                | .774                | .662                | .742                | .206                | .168                | .084                | .631               | .470               | .394               | .595                | .608                | .657               | .763                | .812                | .906                |
|                 | <i>N</i>            | 39                 | 39        | 39                 | 39                  | 39                  | 39                  | 39                  | 39                  | 39                  | 39                  | 39                 | 39                 | 39                 | 39                  | 39                  | 39                 | 39                  | 39                  | 39                  |
| MMSE            | Pearson Correlation | −.321 <sup>*</sup> | −.131     | 1                  | .608 <sup>**</sup>  | .435 <sup>**</sup>  | .462 <sup>**</sup>  | .407 <sup>*</sup>   | .272                | .234                | .467 <sup>**</sup>  | .397 <sup>*</sup>  | .463 <sup>**</sup> | .385 <sup>*</sup>  | .283                | .251                | .254               | −.111               | −.070               | −.393 <sup>*</sup>  |
|                 | Sig. (2-tailed)     | .046               | .425      |                    | .000                | .006                | .003                | .010                | .094                | .152                | .003                | .012               | .003               | .016               | .081                | .124                | .119               | .502                | .672                | .013                |
|                 | <i>N</i>            | 39                 | 39        | 39                 | 39                  | 39                  | 39                  | 39                  | 39                  | 39                  | 39                  | 39                 | 39                 | 39                 | 39                  | 39                  | 39                 | 39                  | 39                  | 39                  |
| #correct        | Pearson Correlation | −.124              | −.080     | .608 <sup>**</sup> | 1                   | .787 <sup>**</sup>  | .746 <sup>**</sup>  | .825 <sup>**</sup>  | .231                | .412 <sup>**</sup>  | .495 <sup>**</sup>  | .684 <sup>**</sup> | .793 <sup>**</sup> | .672 <sup>**</sup> | .433 <sup>**</sup>  | .389 <sup>*</sup>   | .582 <sup>**</sup> | −.031               | −.075               | −.593 <sup>**</sup> |
|                 | Sig. (2-tailed)     | .452               | .629      | .000               |                     | .000                | .000                | .000                | .156                | .009                | .001                | .000               | .000               | .000               | .006                | .014                | .000               | .852                | .650                | .000                |
|                 | <i>N</i>            | 39                 | 39        | 39                 | 39                  | 39                  | 39                  | 39                  | 39                  | 39                  | 39                  | 39                 | 39                 | 39                 | 39                  | 39                  | 39                 | 39                  | 39                  | 39                  |
| #cluster_H1     | Pearson Correlation | −.129              | .047      | .435 <sup>**</sup> | .787 <sup>**</sup>  | 1                   | .803 <sup>**</sup>  | .829 <sup>**</sup>  | .038                | .230                | .266                | .388 <sup>*</sup>  | .533 <sup>**</sup> | .456 <sup>**</sup> | .826 <sup>**</sup>  | .496 <sup>**</sup>  | .647 <sup>**</sup> | −.247               | −.166               | −.520 <sup>**</sup> |
|                 | Sig. (2-tailed)     | .435               | .774      | .006               | .000                |                     | .000                | .000                | .819                | .160                | .102                | .015               | .000               | .004               | .000                | .001                | .000               | .130                | .313                | .001                |
|                 | <i>N</i>            | 39                 | 39        | 39                 | 39                  | 39                  | 39                  | 39                  | 39                  | 39                  | 39                  | 39                 | 39                 | 39                 | 39                  | 39                  | 39                 | 39                  | 39                  | 39                  |
| #cluster_LN     | Pearson Correlation | −.081              | .072      | .462 <sup>**</sup> | .746 <sup>**</sup>  | .803 <sup>**</sup>  | 1                   | .780 <sup>**</sup>  | .088                | .136                | .298                | .485 <sup>**</sup> | .400 <sup>*</sup>  | .422 <sup>**</sup> | .564 <sup>**</sup>  | .820 <sup>**</sup>  | .634 <sup>**</sup> | −.063               | −.336 <sup>*</sup>  | −.529 <sup>**</sup> |
|                 | Sig. (2-tailed)     | .622               | .662      | .003               | .000                | .000                |                     | .000                | .596                | .410                | .065                | .002               | .012               | .008               | .000                | .000                | .000               | .702                | .037                | .001                |
|                 | <i>N</i>            | 39                 | 39        | 39                 | 39                  | 39                  | 39                  | 39                  | 39                  | 39                  | 39                  | 39                 | 39                 | 39                 | 39                  | 39                  | 39                 | 39                  | 39                  | 39                  |
| #cluster_H2     | Pearson Correlation | −.141              | .054      | .407 <sup>*</sup>  | .825 <sup>**</sup>  | .829 <sup>**</sup>  | .780 <sup>**</sup>  | 1                   | .023                | .265                | .133                | .589 <sup>**</sup> | .607 <sup>**</sup> | .500 <sup>**</sup> | .558 <sup>**</sup>  | .476 <sup>**</sup>  | .872 <sup>**</sup> | −.009               | −.119               | −.523 <sup>**</sup> |
|                 | Sig. (2-tailed)     | .392               | .742      | .010               | .000                | .000                |                     |                     | .888                | .102                | .419                | .000               | .000               | .001               | .000                | .002                | .000               | .955                | .471                | .001                |
|                 | <i>N</i>            | 39                 | 39        | 39                 | 39                  | 39                  | 39                  | 39                  | 39                  | 39                  | 39                  | 39                 | 39                 | 39                 | 39                  | 39                  | 39                 | 39                  | 39                  | 39                  |
| cluster size_H1 | Pearson Correlation | .065               | −.207     | .272               | .231                | .038                | .088                | .023                | 1                   | .686 <sup>**</sup>  | .523 <sup>**</sup>  | −.328 <sup>*</sup> | −.099              | −.111              | .080                | .121                | −.007              | −.729 <sup>**</sup> | −.609 <sup>**</sup> | −.439 <sup>**</sup> |
|                 | Sig. (2-tailed)     | .696               | .206      | .094               | .156                | .819                | .596                | .888                |                     | .000                | .001                | .041               | .549               | .503               | .628                | .464                | .968               | .000                | .000                | .005                |
|                 | <i>N</i>            | 39                 | 39        | 39                 | 39                  | 39                  | 39                  | 39                  | 39                  | 39                  | 39                  | 39                 | 39                 | 39                 | 39                  | 39                  | 39                 | 39                  | 39                  | 39                  |
| cluster size_LN | Pearson Correlation | .035               | −.225     | .234               | .412 <sup>**</sup>  | .230                | .136                | .265                | .686 <sup>**</sup>  | 1                   | .522 <sup>**</sup>  | .029               | .014               | .124               | .161                | .132                | .279               | −.398 <sup>*</sup>  | −.662 <sup>**</sup> | −.474 <sup>**</sup> |
|                 | Sig. (2-tailed)     | .834               | .168      | .152               | .009                | .160                | .410                | .102                | .000                |                     | .001                | .861               | .930               | .453               | .327                | .424                | .085               | .012                | .000                | .002                |
|                 | <i>N</i>            | 39                 | 39        | 39                 | 39                  | 39                  | 39                  | 39                  | 39                  | 39                  | 39                  | 39                 | 39                 | 39                 | 39                  | 39                  | 39                 | 39                  | 39                  | 39                  |
| cluster size_H2 | Pearson Correlation | −.009              | −.281     | .467 <sup>**</sup> | .495 <sup>**</sup>  | .266                | .298                | .133                | .523 <sup>**</sup>  | .522 <sup>**</sup>  | 1                   | .091               | .217               | .017               | .138                | .256                | .056               | −.242               | −.312               | −.725 <sup>**</sup> |
|                 | Sig. (2-tailed)     | .954               | .084      | .003               | .001                | .102                | .065                | .419                | .001                | .001                |                     | .582               | .184               | .918               | .402                | .116                | .735               | .138                | .053                | .000                |
|                 | <i>N</i>            | 39                 | 39        | 39                 | 39                  | 39                  | 39                  | 39                  | 39                  | 39                  | 39                  | 39                 | 39                 | 39                 | 39                  | 39                  | 39                 | 39                  | 39                  | 39                  |
| #switch_H1      | Pearson Correlation | −.056              | −.079     | .397 <sup>*</sup>  | .684 <sup>**</sup>  | .388 <sup>*</sup>   | .485 <sup>**</sup>  | .589 <sup>**</sup>  | −.328 <sup>*</sup>  | .029                | .091                | 1                  | .781 <sup>**</sup> | .814 <sup>**</sup> | .070                | .255                | .461 <sup>**</sup> | .627 <sup>**</sup>  | .305                | −.060               |
|                 | Sig. (2-tailed)     | .737               | .631      | .012               | .000                | .015                | .002                | .000                | .041                | .861                | .582                |                    | .000               | .000               | .673                | .117                | .003               | .000                | .059                | .718                |
|                 | <i>N</i>            | 39                 | 39        | 39                 | 39                  | 39                  | 39                  | 39                  | 39                  | 39                  | 39                  | 39                 | 39                 | 39                 | 39                  | 39                  | 39                 | 39                  | 39                  | 39                  |
| #switch_LN      | Pearson Correlation | −.012              | −.119     | .463 <sup>**</sup> | .793 <sup>**</sup>  | .533 <sup>**</sup>  | .400 <sup>*</sup>   | .607 <sup>**</sup>  | −.099               | .014                | .217                | .781 <sup>**</sup> | 1                  | .778 <sup>**</sup> | .236                | .064                | .405 <sup>*</sup>  | .285                | .500 <sup>**</sup>  | −.201               |
|                 | Sig. (2-tailed)     | .942               | .470      | .003               | .000                | .000                | .012                | .000                | .549                | .930                | .184                | .000               |                    | .000               | .149                | .701                | .011               | .079                | .001                | .221                |
|                 | <i>N</i>            | 39                 | 39        | 39                 | 39                  | 39                  | 39                  | 39                  | 39                  | 39                  | 39                  | 39                 | 39                 | 39                 | 39                  | 39                  | 39                 | 39                  | 39                  | 39                  |
| #switch_H2      | Pearson Correlation | .036               | −.140     | .385 <sup>*</sup>  | .672 <sup>**</sup>  | .456 <sup>**</sup>  | .422 <sup>**</sup>  | .500 <sup>**</sup>  | −.111               | .124                | .017                | .814 <sup>**</sup> | .778 <sup>**</sup> | 1                  | .228                | .212                | .373 <sup>*</sup>  | .355 <sup>*</sup>   | .252                | .176                |
|                 | Sig. (2-tailed)     | .828               | .394      | .016               | .000                | .004                | .008                | .001                | .503                | .453                | .918                | .000               | .000               |                    | .162                | .196                | .019               | .027                | .122                | .284                |
|                 | <i>N</i>            | 39                 | 39        | 39                 | 39                  | 39                  | 39                  | 39                  | 39                  | 39                  | 39                  | 39                 | 39                 | 39                 | 39                  | 39                  | 39                 | 39                  | 39                  | 39                  |
| %cluster_H1     | Pearson Correlation | −.026              | −.088     | .283               | .433 <sup>**</sup>  | .826 <sup>**</sup>  | .564 <sup>**</sup>  | .558 <sup>**</sup>  | .080                | .161                | .138                | .070               | .236               | .228               | 1                   | .456 <sup>**</sup>  | .543 <sup>**</sup> | −.467 <sup>**</sup> | −.204               | −.325 <sup>*</sup>  |
|                 | Sig. (2-tailed)     | .877               | .595      | .081               | .006                | .000                | .000                | .000                | .628                | .327                | .402                | .673               | .149               | .162               |                     | .004                | .000               | .003                | .213                | .044                |
|                 | <i>N</i>            | 39                 | 39        | 39                 | 39                  | 39                  | 39                  | 39                  | 39                  | 39                  | 39                  | 39                 | 39                 | 39                 | 39                  | 39                  | 39                 | 39                  | 39                  | 39                  |
| %cluster_LN     | Pearson Correlation | .154               | −.085     | .251               | .389 <sup>*</sup>   | .496 <sup>**</sup>  | .820 <sup>**</sup>  | .476 <sup>**</sup>  | .121                | .132                | .256                | .255               | .064               | .212               | .456 <sup>**</sup>  | 1                   | .563 <sup>**</sup> | −.022               | −.500 <sup>**</sup> | −.343 <sup>*</sup>  |
|                 | Sig. (2-tailed)     | .349               | .608      | .124               | .014                | .001                | .000                | .002                | .464                | .424                | .116                | .117               | .701               | .196               | .004                |                     | .000               | .894                | .001                | .032                |
|                 | <i>N</i>            | 39                 | 39        | 39                 | 39                  | 39                  | 39                  | 39                  | 39                  | 39                  | 39                  | 39                 | 39                 | 39                 | 39                  | 39                  | 39                 | 39                  | 39                  | 39                  |
| %cluster_H2     | Pearson Correlation | .008               | −.073     | .254               | .582 <sup>**</sup>  | .647 <sup>**</sup>  | .634 <sup>**</sup>  | .872 <sup>**</sup>  | −.007               | .279                | .056                | .461 <sup>**</sup> | .405 <sup>*</sup>  | .373 <sup>*</sup>  | .543 <sup>**</sup>  | .563 <sup>**</sup>  | 1                  | .061                | −.180               | −.387 <sup>*</sup>  |
|                 | Sig. (2-tailed)     | .963               | .657      | .119               | .000                | .000                | .000                | .000                | .968                | .085                | .735                | .003               | .011               | .019               | .000                | .000                |                    | .712                | .273                | .015                |
|                 | <i>N</i>            | 39                 | 39        | 39                 | 39                  | 39                  | 39                  | 39                  | 39                  | 39                  | 39                  | 39                 | 39                 | 39                 | 39                  | 39                  | 39                 | 39                  | 39                  | 39                  |
| %switch_H1      | Pearson Correlation | .032               | .050      | −.111              | −.031               | −.247               | −.063               | −.009               | −.729 <sup>**</sup> | −.398 <sup>*</sup>  | −.242               | .627 <sup>**</sup> | .285               | .355 <sup>*</sup>  | −.467 <sup>**</sup> | −.022               | .061               | 1                   | .538 <sup>**</sup>  | .385 <sup>*</sup>   |
|                 | Sig. (2-tailed)     | .848               | .763      | .502               | .852                | .130                | .702                | .955                | .000                | .012                | .138                | .000               | .079               | .027               | .003                | .894                | .712               |                     | .000                | .016                |
|                 | <i>N</i>            | 39                 | 39        | 39                 | 39                  | 39                  | 39                  | 39                  | 39                  | 39                  | 39                  | 39                 | 39                 | 39                 | 39                  | 39                  | 39                 | 39                  | 39                  | 39                  |
| %switch_LN      | Pearson Correlation | −.003              | .039      | −.070              | −.075               | −.166               | −.336 <sup>*</sup>  | −.119               | −.609 <sup>**</sup> | −.662 <sup>**</sup> | −.312               | .305               | .500 <sup>**</sup> | .252               | −.204               | −.500 <sup>**</sup> | −.180              | .538 <sup>**</sup>  | 1                   | .411 <sup>**</sup>  |
|                 | Sig. (2-tailed)     | .983               | .812      | .672               | .650                | .313                | .037                | .471                | .000                | .000                | .053                | .059               | .001               | .122               | .213                | .001                | .273               | .000                |                     | .009                |
|                 | <i>N</i>            | 39                 | 39        | 39                 | 39                  | 39                  | 39                  | 39                  | 39                  | 39                  | 39                  | 39                 | 39                 | 39                 | 39                  | 39                  | 39                 | 39                  | 39                  | 39                  |
| %switch_H2      | Pearson Correlation | .119               | .019      | −.393 <sup>*</sup> | −.593 <sup>**</sup> | −.520 <sup>**</sup> | −.529 <sup>**</sup> | −.523 <sup>**</sup> | −.439 <sup>**</sup> | −.474 <sup>**</sup> | −.725 <sup>**</sup> | −.060              | −.201              | .176               | −.325 <sup>*</sup>  | −.343 <sup>*</sup>  | −.387 <sup>*</sup> | .385 <sup>*</sup>   | .411 <sup>**</sup>  | 1                   |
|                 | Sig. (2-tailed)     | .469               | .906      | .013               | .000                | .001                | .001                | .001                | .005                | .002                | .000                | .718               | .221               | .284               | .044                | .032                | .015               | .016                | .009                |                     |
|                 | <i>N</i>            | 39                 | 39        | 39                 | 39                  | 39                  | 39                  | 39                  | 39                  | 39                  | 39                  | 39                 | 39                 | 39                 | 39                  | 39                  | 39                 | 39                  | 39                  | 39                  |

Note. H1 = Rater 1; H2 = Rater 2; LN = Lancaster Norms. \*Correlation is significant at the .05 level (2-tailed). \*\*Correlation is significant at the .01 level (2-tailed).
