# Supplementary material
Source: publisher figshare collection journal article supplement (https://asha.figshare.com/articles/dataset/_/24061017)
Supplement: Supplementary file [file 1]

Supplemental Material S3. Correlations between all variables in participants with Alzheimer's Disease.

|                 |                     | age               | education          | MMSE              | #correct            | #cluster_H1         | #cluster_LN         | #cluster_H2         | cluster size_H1      | cluster size_LN      | cluster size_H2      | #switch_H1          | #switch_LN          | #switch_H2          | %cluster_H1          | %cluster_LN         | %cluster_H2         | %switch_H1           | %switch_LN           | %switch_H2           |
|-----------------|---------------------|-------------------|--------------------|-------------------|---------------------|---------------------|---------------------|---------------------|----------------------|----------------------|----------------------|---------------------|---------------------|---------------------|----------------------|---------------------|---------------------|----------------------|----------------------|----------------------|
| age             | Pearson Correlation | 1                 | −.153              | −.077             | .292                | .297                | .493 <sup>‡</sup>   | .325                | .296                 | .301                 | .355                 | .141                | .039                | .166                | .200                 | .535 <sup>‡</sup>   | .317                | −.097                | −.402                | −.318                |
|                 | Sig. (2-tailed)     |                   | .531               | .753              | .224                | .217                | .032                | .174                | .219                 | .210                 | .136                 | .564                | .875                | .496                | .413                 | .018                | .185                | .694                 | .088                 | .185                 |
|                 | <i>n</i>            | 19                | 19                 | 19                | 19                  | 19                  | 19                  | 19                  | 19                   | 19                   | 19                   | 19                  | 19                  | 19                  | 19                   | 19                  | 19                  | 19                   | 19                   | 19                   |
| education       | Pearson Correlation | −.153             | 1                  | −.276             | −.355               | −.376               | −.374               | −.392               | −.333                | −.338                | −.375                | −.239               | −.220               | −.337               | −.456 <sup>‡</sup>   | −.433               | −.456 <sup>‡</sup>  | .146                 | .229                 | .175                 |
|                 | Sig. (2-tailed)     | .531              |                    | .253              | .136                | .112                | .115                | .097                | .163                 | .157                 | .114                 | .325                | .365                | .158                | .050                 | .064                | .050                | .551                 | .346                 | .474                 |
|                 | <i>n</i>            | 19                | 19                 | 19                | 19                  | 19                  | 19                  | 19                  | 19                   | 19                   | 19                   | 19                  | 19                  | 19                  | 19                   | 19                  | 19                  | 19                   | 19                   | 19                   |
| MMSE            | Pearson Correlation | −.077             | −.276              | 1                 | .411                | .260                | .307                | .189                | .323                 | .190                 | .502 <sup>‡</sup>    | .250                | .314                | .323                | .190                 | .188                | .115                | −.131                | −.064                | −.236                |
|                 | Sig. (2-tailed)     | .753              | .253               |                   | .080                | .282                | .201                | .437                | .177                 | .436                 | .028                 | .303                | .191                | .177                | .436                 | .440                | .640                | .592                 | .794                 | .332                 |
|                 | <i>n</i>            | 19                | 19                 | 19                | 19                  | 19                  | 19                  | 19                  | 19                   | 19                   | 19                   | 19                  | 19                  | 19                  | 19                   | 19                  | 19                  | 19                   | 19                   | 19                   |
| #correct        | Pearson Correlation | .292              | −.355              | .411              | 1                   | .821 <sup>***</sup> | .779 <sup>***</sup> | .842 <sup>***</sup> | .188                 | .435                 | .725 <sup>***</sup>  | .817 <sup>***</sup> | .839 <sup>***</sup> | .833 <sup>***</sup> | .360                 | .429                | .512 <sup>‡</sup>   | .147                 | −.031                | −.512 <sup>‡</sup>   |
|                 | Sig. (2-tailed)     | .224              | .136               | .080              |                     | .000                | .000                | .000                | .440                 | .063                 | .000                 | .000                | .000                | .000                | .130                 | .067                | .025                | .548                 | .899                 | .025                 |
|                 | <i>n</i>            | 19                | 19                 | 19                | 19                  | 19                  | 19                  | 19                  | 19                   | 19                   | 19                   | 19                  | 19                  | 19                  | 19                   | 19                  | 19                  | 19                   | 19                   | 19                   |
| #cluster_H1     | Pearson Correlation | .297              | −.376              | .260              | .821 <sup>***</sup> | 1                   | .774 <sup>***</sup> | .751 <sup>***</sup> | .255                 | .343                 | .563 <sup>‡</sup>    | .449                | .631 <sup>***</sup> | .658 <sup>***</sup> | .757 <sup>***</sup>  | .472 <sup>‡</sup>   | .495 <sup>‡</sup>   | −.219                | −.122                | −.438                |
|                 | Sig. (2-tailed)     | .217              | .112               | .282              | .000                |                     | .000                | .000                | .293                 | .150                 | .012                 | .054                | .004                | .002                | .000                 | .041                | .031                | .367                 | .620                 | .061                 |
|                 | <i>n</i>            | 19                | 19                 | 19                | 19                  | 19                  | 19                  | 19                  | 19                   | 19                   | 19                   | 19                  | 19                  | 19                  | 19                   | 19                  | 19                  | 19                   | 19                   | 19                   |
| #cluster_LN     | Pearson Correlation | .493 <sup>‡</sup> | −.374              | .307              | .779 <sup>***</sup> | .774 <sup>***</sup> | 1                   | .710 <sup>***</sup> | .308                 | .281                 | .688 <sup>***</sup>  | .487 <sup>‡</sup>   | .485 <sup>‡</sup>   | .562 <sup>‡</sup>   | .463 <sup>‡</sup>    | .839 <sup>***</sup> | .522 <sup>‡</sup>   | −.021                | −.317                | −.557 <sup>‡</sup>   |
|                 | Sig. (2-tailed)     | .032              | .115               | .201              | .000                | .000                |                     | .001                | .200                 | .244                 | .001                 | .034                | .035                | .012                | .046                 | .000                | .022                | .931                 | .186                 | .013                 |
|                 | <i>n</i>            | 19                | 19                 | 19                | 19                  | 19                  | 19                  | 19                  | 19                   | 19                   | 19                   | 19                  | 19                  | 19                  | 19                   | 19                  | 19                  | 19                   | 19                   | 19                   |
| #cluster_H2     | Pearson Correlation | .325              | −.392              | .189              | .842 <sup>***</sup> | .751 <sup>***</sup> | .710 <sup>***</sup> | 1                   | .120                 | .484 <sup>‡</sup>    | .540 <sup>‡</sup>    | .734 <sup>***</sup> | .662 <sup>***</sup> | .651 <sup>***</sup> | .446                 | .488 <sup>‡</sup>   | .850 <sup>***</sup> | .186                 | −.096                | −.527 <sup>‡</sup>   |
|                 | Sig. (2-tailed)     | .174              | .097               | .437              | .000                | .000                | .001                |                     | .625                 | .036                 | .017                 | .000                | .002                | .003                | .056                 | .034                | .000                | .445                 | .694                 | .020                 |
|                 | <i>n</i>            | 19                | 19                 | 19                | 19                  | 19                  | 19                  | 19                  | 19                   | 19                   | 19                   | 19                  | 19                  | 19                  | 19                   | 19                  | 19                  | 19                   | 19                   | 19                   |
| cluster size_H1 | Pearson Correlation | .296              | −.333              | .323              | .188                | .255                | .308                | .120                | 1                    | .668 <sup>***</sup>  | .405                 | −.239               | −.217               | .034                | .406                 | .361                | .146                | −.749 <sup>***</sup> | −.814 <sup>***</sup> | −.339                |
|                 | Sig. (2-tailed)     | .219              | .163               | .177              | .440                | .293                | .200                | .625                |                      | .002                 | .085                 | .325                | .373                | .890                | .084                 | .129                | .552                | .000                 | .000                 | .156                 |
|                 | <i>n</i>            | 19                | 19                 | 19                | 19                  | 19                  | 19                  | 19                  | 19                   | 19                   | 19                   | 19                  | 19                  | 19                  | 19                   | 19                  | 19                  | 19                   | 19                   | 19                   |
| cluster size_LN | Pearson Correlation | .301              | −.338              | .190              | .435                | .343                | .281                | .484 <sup>‡</sup>   | .668 <sup>***</sup>  | 1                    | .510 <sup>‡</sup>    | .230                | .022                | .227                | .254                 | .303                | .460 <sup>‡</sup>   | −.256                | −.722 <sup>***</sup> | −.498 <sup>‡</sup>   |
|                 | Sig. (2-tailed)     | .210              | .157               | .436              | .063                | .150                | .244                | .036                | .002                 |                      | .026                 | .344                | .927                | .351                | .294                 | .207                | .048                | .289                 | .000                 | .030                 |
|                 | <i>n</i>            | 19                | 19                 | 19                | 19                  | 19                  | 19                  | 19                  | 19                   | 19                   | 19                   | 19                  | 19                  | 19                  | 19                   | 19                  | 19                  | 19                   | 19                   | 19                   |
| cluster size_H2 | Pearson Correlation | .355              | −.375              | .502 <sup>‡</sup> | .725 <sup>***</sup> | .563 <sup>‡</sup>   | .688 <sup>***</sup> | .540 <sup>‡</sup>   | .405                 | .510 <sup>‡</sup>    | 1                    | .463 <sup>‡</sup>   | .381                | .362                | .262                 | .549 <sup>‡</sup>   | .388                | −.008                | −.372                | −.789 <sup>***</sup> |
|                 | Sig. (2-tailed)     | .136              | .114               | .028              | .000                | .012                | .001                | .017                | .085                 | .026                 |                      | .046                | .108                | .127                | .279                 | .015                | .100                | .973                 | .117                 | .000                 |
|                 | <i>n</i>            | 19                | 19                 | 19                | 19                  | 19                  | 19                  | 19                  | 19                   | 19                   | 19                   | 19                  | 19                  | 19                  | 19                   | 19                  | 19                  | 19                   | 19                   | 19                   |
| #switch_H1      | Pearson Correlation | .141              | −.239              | .250              | .817 <sup>***</sup> | .449                | .487 <sup>‡</sup>   | .734 <sup>***</sup> | −.239                | .230                 | .463 <sup>‡</sup>    | 1                   | .875 <sup>***</sup> | .816 <sup>***</sup> | −.027                | .239                | .490 <sup>‡</sup>   | .635 <sup>***</sup>  | .308                 | −.230                |
|                 | Sig. (2-tailed)     | .564              | .325               | .303              | .000                | .054                | .034                | .000                | .325                 | .344                 | .046                 |                     | .000                | .000                | .914                 | .325                | .033                | .004                 | .199                 | .344                 |
|                 | <i>n</i>            | 19                | 19                 | 19                | 19                  | 19                  | 19                  | 19                  | 19                   | 19                   | 19                   | 19                  | 19                  | 19                  | 19                   | 19                  | 19                  | 19                   | 19                   | 19                   |
| #switch_LN      | Pearson Correlation | .039              | −.220              | .314              | .839 <sup>***</sup> | .631 <sup>***</sup> | .485 <sup>‡</sup>   | .662 <sup>***</sup> | −.217                | .022                 | .381                 | .875 <sup>***</sup> | 1                   | .907 <sup>***</sup> | .197                 | .110                | .346                | .401                 | .484 <sup>‡</sup>    | −.082                |
|                 | Sig. (2-tailed)     | .875              | .365               | .191              | .000                | .004                | .035                | .002                | .373                 | .927                 | .108                 | .000                |                     | .000                | .419                 | .654                | .147                | .089                 | .036                 | .740                 |
|                 | <i>n</i>            | 19                | 19                 | 19                | 19                  | 19                  | 19                  | 19                  | 19                   | 19                   | 19                   | 19                  | 19                  | 19                  | 19                   | 19                  | 19                  | 19                   | 19                   | 19                   |
| #switch_H2      | Pearson Correlation | .166              | −.337              | .323              | .833 <sup>***</sup> | .658 <sup>***</sup> | .562 <sup>‡</sup>   | .651 <sup>***</sup> | .034                 | .227                 | .362                 | .816 <sup>***</sup> | .907 <sup>***</sup> | 1                   | .271                 | .284                | .400                | .263                 | .219                 | .039                 |
|                 | Sig. (2-tailed)     | .496              | .158               | .177              | .000                | .002                | .012                | .003                | .890                 | .351                 | .127                 | .000                | .000                |                     | .261                 | .239                | .090                | .277                 | .367                 | .874                 |
|                 | <i>n</i>            | 19                | 19                 | 19                | 19                  | 19                  | 19                  | 19                  | 19                   | 19                   | 19                   | 19                  | 19                  | 19                  | 19                   | 19                  | 19                  | 19                   | 19                   | 19                   |
| %cluster_H1     | Pearson Correlation | .200              | −.456 <sup>‡</sup> | .190              | .360                | .757 <sup>***</sup> | .463 <sup>‡</sup>   | .446                | .406                 | .254                 | .262                 | −.027               | .197                | .271                | 1                    | .400                | .424                | −.596 <sup>***</sup> | −.223                | −.227                |
|                 | Sig. (2-tailed)     | .413              | .050               | .436              | .130                | .000                | .046                | .056                | .084                 | .294                 | .279                 | .914                | .419                | .261                |                      | .090                | .070                | .007                 | .359                 | .349                 |
|                 | <i>n</i>            | 19                | 19                 | 19                | 19                  | 19                  | 19                  | 19                  | 19                   | 19                   | 19                   | 19                  | 19                  | 19                  | 19                   | 19                  | 19                  | 19                   | 19                   | 19                   |
| %cluster_LN     | Pearson Correlation | .535 <sup>‡</sup> | −.433              | .188              | .429                | .472 <sup>‡</sup>   | .839 <sup>***</sup> | .488 <sup>‡</sup>   | .361                 | .303                 | .549 <sup>‡</sup>    | .239                | .110                | .284                | .400                 | 1                   | .567 <sup>‡</sup>   | −.025                | −.525 <sup>‡</sup>   | −.419                |
|                 | Sig. (2-tailed)     | .018              | .064               | .440              | .067                | .041                | .000                | .034                | .129                 | .207                 | .015                 | .325                | .654                | .239                | .090                 |                     | .011                | .918                 | .021                 | .074                 |
|                 | <i>n</i>            | 19                | 19                 | 19                | 19                  | 19                  | 19                  | 19                  | 19                   | 19                   | 19                   | 19                  | 19                  | 19                  | 19                   | 19                  | 19                  | 19                   | 19                   | 19                   |
| %cluster_H2     | Pearson Correlation | .317              | −.456 <sup>‡</sup> | .115              | .512 <sup>‡</sup>   | .495 <sup>‡</sup>   | .522 <sup>‡</sup>   | .850 <sup>***</sup> | .146                 | .460 <sup>‡</sup>    | .388                 | .490 <sup>‡</sup>   | .346                | .400                | .424                 | .567 <sup>‡</sup>   | 1                   | .182                 | −.216                | −.370                |
|                 | Sig. (2-tailed)     | .185              | .050               | .640              | .025                | .031                | .022                | .000                | .552                 | .048                 | .100                 | .033                | .147                | .090                | .070                 | .011                |                     | .457                 | .375                 | .119                 |
|                 | <i>n</i>            | 19                | 19                 | 19                | 19                  | 19                  | 19                  | 19                  | 19                   | 19                   | 19                   | 19                  | 19                  | 19                  | 19                   | 19                  | 19                  | 19                   | 19                   | 19                   |
| %switch_H1      | Pearson Correlation | −.097             | .146               | −.131             | .147                | −.219               | −.021               | .186                | −.749 <sup>***</sup> | −.256                | −.008                | .635 <sup>***</sup> | .401                | .263                | −.596 <sup>***</sup> | −.025               | .182                | 1                    | .537 <sup>‡</sup>    | .121                 |
|                 | Sig. (2-tailed)     | .694              | .551               | .592              | .548                | .367                | .931                | .445                | .000                 | .289                 | .973                 | .004                | .089                | .277                | .007                 | .918                | .457                |                      | .018                 | .623                 |
|                 | <i>n</i>            | 19                | 19                 | 19                | 19                  | 19                  | 19                  | 19                  | 19                   | 19                   | 19                   | 19                  | 19                  | 19                  | 19                   | 19                  | 19                  | 19                   | 19                   | 19                   |
| %switch_LN      | Pearson Correlation | −.402             | .229               | −.064             | −.031               | −.122               | −.317               | −.096               | −.814 <sup>***</sup> | −.722 <sup>***</sup> | −.372                | .308                | .484 <sup>‡</sup>   | .219                | −.223                | −.525 <sup>‡</sup>  | −.216               | .537 <sup>‡</sup>    | 1                    | .472 <sup>‡</sup>    |
|                 | Sig. (2-tailed)     | .088              | .346               | .794              | .899                | .620                | .186                | .694                | .000                 | .000                 | .117                 | .199                | .036                | .367                | .359                 | .021                | .375                | .018                 |                      | .041                 |
|                 | <i>n</i>            | 19                | 19                 | 19                | 19                  | 19                  | 19                  | 19                  | 19                   | 19                   | 19                   | 19                  | 19                  | 19                  | 19                   | 19                  | 19                  | 19                   | 19                   | 19                   |
| %switch_H2      | Pearson Correlation | −.318             | .175               | −.236             | −.512 <sup>‡</sup>  | −.438               | −.557 <sup>‡</sup>  | −.527 <sup>‡</sup>  | −.339                | −.498 <sup>‡</sup>   | −.789 <sup>***</sup> | −.230               | −.082               | .039                | −.227                | −.419               | −.370               | .121                 | .472 <sup>‡</sup>    | 1                    |
|                 | Sig. (2-tailed)     | .185              | .474               | .332              | .025                | .061                | .013                | .020                | .156                 | .030                 | .000                 | .344                | .740                | .874                | .349                 | .074                | .119                | .623                 | .041                 |                      |
|                 | <i>n</i>            | 19                | 19                 | 19                | 19                  | 19                  | 19                  | 19                  | 19                   | 19                   | 19                   | 19                  | 19                  | 19                  | 19                   | 19                  | 19                  | 19                   | 19                   | 19                   |

Note. H1 = Rater 1; H2 = Rater 2; LN = Lancaster Norms; size = average cluster size. \*Correlation is significant at the .05 level (2-tailed). \*\*Correlation is significant at the .01 level (2-tailed).
