# Supplementary material
Source: publisher figshare collection journal article supplement (https://asha.figshare.com/articles/dataset/_/24061017)
Supplement: Supplementary file [file 1]

Supplemental Material S2. Correlations between all variables in cognitively healthy older adults.

|                 |                     | age     | education | MMSE    | #correct | #cluster_H1 | #cluster_LN | #cluster_H2 | cluster size_H1 | cluster size_LN | cluster size_H2 | #switch_H1 | #switch_LN | #switch_H2 | %cluster_H1 | %cluster_LN | %cluster_H2 | %switch_H1 | %switch_LN | %switch_H2 |
|-----------------|---------------------|---------|-----------|---------|----------|-------------|-------------|-------------|-----------------|-----------------|-----------------|------------|------------|------------|-------------|-------------|-------------|------------|------------|------------|
| age             | Pearson Correlation | 1       | −.002     | −.678** | −.235    | −.187       | −.385       | −.212       | −.085           | −.201           | −.157           | .010       | .399       | .162       | −.089       | −.362       | −.165       | .171       | .575**     | .271       |
|                 | Sig. (2-tailed)     |         | .995      | .001    | .319     | .431        | .093        | .370        | .722            | .394            | .507            | .967       | .081       | .494       | .709        | .117        | .486        | .470       | .008       | .247       |
|                 | <i>n</i>            | 20      | 20        | 20      | 20       | 20          | 20          | 20          | 20              | 20              | 20              | 20         | 20         | 20         | 20          | 20          | 20          | 20         | 20         | 20         |
| education       | Pearson Correlation | −.002   | 1         | .076    | .263     | .408        | .494*       | .376        | −.083           | −.085           | −.237           | .061       | −.068      | .067       | .359        | .484*       | .369        | −.079      | −.221      | −.099      |
|                 | Sig. (2-tailed)     | .995    |           | .750    | .262     | .074        | .027        | .102        | .727            | .721            | .315            | .797       | .777       | .779       | .120        | .031        | .109        | .741       | .349       | .677       |
|                 | <i>n</i>            | 20      | 20        | 20      | 20       | 20          | 20          | 20          | 20              | 20              | 20              | 20         | 20         | 20         | 20          | 20          | 20          | 20         | 20         | 20         |
| MMSE            | Pearson Correlation | −.678** | .076      | 1       | .254     | .086        | .462*       | .199        | .063            | −.048           | −.024           | .169       | −.139      | −.077      | −.054       | .463*       | .149        | .034       | −.310      | −.205      |
|                 | Sig. (2-tailed)     | .001    | .750      |         | .281     | .719        | .040        | .401        | .793            | .842            | .920            | .477       | .559       | .746       | .822        | .040        | .531        | .886       | .183       | .385       |
|                 | <i>n</i>            | 20      | 20        | 20      | 20       | 20          | 20          | 20          | 20              | 20              | 20              | 20         | 20         | 20         | 20          | 20          | 20          | 20         | 20         | 20         |
| #correct        | Pearson Correlation | −.235   | .263      | .254    | 1        | .579**      | .625**      | .789**      | .189            | .226            | −.210           | .245       | .366       | .183       | .234        | .384        | .623**      | −.284      | −.322      | −.424      |
|                 | Sig. (2-tailed)     | .319    | .262      | .281    |          | .008        | .003        | .000        | .425            | .339            | .374            | .297       | .112       | .439       | .322        | .095        | .003        | .225       | .166       | .063       |
|                 | <i>n</i>            | 20      | 20        | 20      | 20       | 20          | 20          | 20          | 20              | 20              | 20              | 20         | 20         | 20         | 20          | 20          | 20          | 20         | 20         | 20         |
| #cluster_H1     | Pearson Correlation | −.187   | .408      | .086    | .579**   | 1           | .744**      | .772**      | −.306           | −.092           | −.317           | .000       | .026       | .000       | .921**      | .648**      | .740**      | −.312      | −.330      | −.331      |
|                 | Sig. (2-tailed)     | .431    | .074      | .719    | .008     |             | .000        | .000        | .189            | .698            | .173            | 1.000      | .913       | 1.000      | .000        | .002        | .000        | .181       | .155       | .154       |
|                 | <i>n</i>            | 20      | 20        | 20      | 20       | 20          | 20          | 20          | 20              | 20              | 20              | 20         | 20         | 20         | 20          | 20          | 20          | 20         | 20         | 20         |
| #cluster_LN     | Pearson Correlation | −.385   | .494*     | .462*   | .625**   | .744**      | 1           | .748**      | −.229           | −.246           | −.310           | .270       | −.078      | .048       | .559*       | .955**      | .672**      | −.070      | −.474*     | −.321      |
|                 | Sig. (2-tailed)     | .093    | .027      | .040    | .003     | .000        |             | .000        | .331            | .296            | .184            | .249       | .744       | .841       | .010        | .000        | .001        | .769       | .035       | .168       |
|                 | <i>n</i>            | 20      | 20        | 20      | 20       | 20          | 20          | 20          | 20              | 20              | 20              | 20         | 20         | 20         | 20          | 20          | 20          | 20         | 20         | 20         |
| #cluster_H2     | Pearson Correlation | −.212   | .376      | .199    | .789**   | .772**      | .748**      | 1           | −.192           | −.091           | −.511*          | .303       | .298       | .187       | .559*       | .584**      | .964**      | −.122      | −.227      | −.305      |
|                 | Sig. (2-tailed)     | .370    | .102      | .401    | .000     | .000        |             |             | .417            | .704            | .021            | .193       | .202       | .429       | .010        | .007        | .000        | .610       | .336       | .191       |
|                 | <i>n</i>            | 20      | 20        | 20      | 20       | 20          | 20          | 20          | 20              | 20              | 20              | 20         | 20         | 20         | 20          | 20          | 20          | 20         | 20         | 20         |
| cluster size_H1 | Pearson Correlation | −.085   | −.083     | .063    | .189     | −.306       | −.229       | −.192       | 1               | .721**          | .623**          | −.645**    | −.217      | −.448*     | −.432       | −.309       | −.286       | −.717**    | −.366      | −.499*     |
|                 | Sig. (2-tailed)     | .722    | .727      | .793    | .425     | .189        | .331        | .417        |                 | .000            | .003            | .002       | .358       | .048       | .057        | .184        | .222        | .000       | .112       | .025       |
|                 | <i>n</i>            | 20      | 20        | 20      | 20       | 20          | 20          | 20          | 20              | 20              | 20              | 20         | 20         | 20         | 20          | 20          | 20          | 20         | 20         | 20         |
| cluster size_LN | Pearson Correlation | −.201   | −.085     | −.048   | .226     | −.092       | −.246       | −.091       | .721**          | 1               | .476*           | −.533*     | −.406      | −.267      | −.172       | −.347       | −.151       | −.667**    | −.609**    | −.389      |
|                 | Sig. (2-tailed)     | .394    | .721      | .842    | .339     | .698        | .296        | .704        | .000            |                 | .034            | .015       | .076       | .256       | .468        | .134        | .525        | .001       | .004       | .090       |
|                 | <i>n</i>            | 20      | 20        | 20      | 20       | 20          | 20          | 20          | 20              | 20              | 20              | 20         | 20         | 20         | 20          | 20          | 20          | 20         | 20         | 20         |
| cluster size_H2 | Pearson Correlation | −.157   | −.237     | −.024   | −.210    | −.317       | −.310       | −.511*      | .623**          | .476*           | 1               | −.661**    | −.462*     | −.767**    | −.272       | −.285       | −.587**     | −.555*     | −.316      | −.580**    |
|                 | Sig. (2-tailed)     | .507    | .315      | .920    | .374     | .173        | .184        | .021        | .003            | .034            |                 | .001       | .040       | .000       | .245        | .224        | .006        | .011       | .175       | .007       |
|                 | <i>n</i>            | 20      | 20        | 20      | 20       | 20          | 20          | 20          | 20              | 20              | 20              | 20         | 20         | 20         | 20          | 20          | 20          | 20         | 20         | 20         |
| #switch_H1      | Pearson Correlation | .010    | .061      | .169    | .245     | .000        | .270        | .303        | −.645**         | −.533*          | −.661**         | 1          | .524*      | .739**     | −.136       | .224        | .270        | .852**     | .350       | .505*      |
|                 | Sig. (2-tailed)     | .967    | .797      | .477    | .297     | 1.000       | .249        | .193        | .002            | .015            | .001            |            | .018       | .000       | .567        | .343        | .250        | .000       | .130       | .023       |
|                 | <i>n</i>            | 20      | 20        | 20      | 20       | 20          | 20          | 20          | 20              | 20              | 20              | 20         | 20         | 20         | 20          | 20          | 20          | 20         | 20         | 20         |
| #switch_LN      | Pearson Correlation | .399    | −.068     | −.139   | .366     | .026        | −.078       | .298        | −.217           | −.406           | −.462*          | .524*      | 1          | .471*      | −.115       | −.236       | .251        | .348       | .752**     | .206       |
|                 | Sig. (2-tailed)     | .081    | .777      | .559    | .112     | .913        | .744        | .202        | .358            | .076            | .040            | .018       |            | .036       | .629        | .316        | .287        | .133       | .000       | .384       |
|                 | <i>n</i>            | 20      | 20        | 20      | 20       | 20          | 20          | 20          | 20              | 20              | 20              | 20         | 20         | 20         | 20          | 20          | 20          | 20         | 20         | 20         |
| #switch_H2      | Pearson Correlation | .162    | .067      | −.077   | .183     | .000        | .048        | .187        | −.448*          | −.267           | −.767**         | .739**     | .471*      | 1          | −.095       | −.013       | .155        | .642**     | .327       | .805**     |
|                 | Sig. (2-tailed)     | .494    | .779      | .746    | .439     | 1.000       | .841        | .429        | .048            | .256            | .000            | .000       | .036       |            | .691        | .956        | .514        | .002       | .159       | .000       |
|                 | <i>n</i>            | 20      | 20        | 20      | 20       | 20          | 20          | 20          | 20              | 20              | 20              | 20         | 20         | 20         | 20          | 20          | 20          | 20         | 20         | 20         |
| %cluster_H1     | Pearson Correlation | −.089   | .359      | −.054   | .234     | .921**      | .559*       | .559*       | −.432           | −.172           | −.272           | −.136      | −.115      | −.095      | 1           | .545*       | .604**      | −.273      | −.226      | −.219      |
|                 | Sig. (2-tailed)     | .709    | .120      | .822    | .322     | .000        | .010        | .010        | .057            | .468            | .245            | .567       | .629       | .691       |             | .013        | .005        | .244       | .337       | .354       |
|                 | <i>n</i>            | 20      | 20        | 20      | 20       | 20          | 20          | 20          | 20              | 20              | 20              | 20         | 20         | 20         | 20          | 20          | 20          | 20         | 20         | 20         |
| %cluster_LN     | Pearson Correlation | −.362   | .484*     | .463*   | .384     | .648**      | .955**      | .584**      | −.309           | −.347           | −.285           | .224       | −.236      | −.013      | .545*       | 1           | .557*       | .006       | −.473*     | −.236      |
|                 | Sig. (2-tailed)     | .117    | .031      | .040    | .095     | .002        | .000        | .007        | .184            | .134            | .224            | .343       | .316       | .956       | .013        |             | .011        | .978       | .035       | .317       |
|                 | <i>n</i>            | 20      | 20        | 20      | 20       | 20          | 20          | 20          | 20              | 20              | 20              | 20         | 20         | 20         | 20          | 20          | 20          | 20         | 20         | 20         |
| %cluster_H2     | Pearson Correlation | −.165   | .369      | .149    | .623**   | .740**      | .672**      | .964**      | −.286           | −.151           | −.587**         | .270       | .251       | .155       | .604**      | .557*       | 1           | −.073      | −.166      | −.243      |
|                 | Sig. (2-tailed)     | .486    | .109      | .531    | .003     | .000        | .001        | .000        | .222            | .525            | .006            | .250       | .287       | .514       | .005        | .011        |             | .759       | .483       | .302       |
|                 | <i>n</i>            | 20      | 20        | 20      | 20       | 20          | 20          | 20          | 20              | 20              | 20              | 20         | 20         | 20         | 20          | 20          | 20          | 20         | 20         | 20         |
| %switch_H1      | Pearson Correlation | .171    | −.079     | .034    | −.284    | −.312       | −.070       | −.122       | −.717**         | −.667**         | −.555*          | .852**     | .348       | .642**     | −.273       | .006        | −.073       | 1          | .547*      | .741**     |
|                 | Sig. (2-tailed)     | .470    | .741      | .886    | .225     | .181        | .769        | .610        | .000            | .001            | .011            | .000       | .133       | .002       | .244        | .978        | .759        |            | .013       | .000       |
|                 | <i>n</i>            | 20      | 20        | 20      | 20       | 20          | 20          | 20          | 20              | 20              | 20              | 20         | 20         | 20         | 20          | 20          | 20          | 20         | 20         | 20         |
| %switch_LN      | Pearson Correlation | .575**  | −.221     | −.310   | −.322    | −.330       | −.474*      | −.227       | −.366           | −.609**         | −.316           | .350       | .752**     | .327       | −.226       | −.473*      | −.166       | .547*      | 1          | .489*      |
|                 | Sig. (2-tailed)     | .008    | .349      | .183    | .166     | .155        | .035        | .336        | .112            | .004            | .175            | .130       | .000       | .159       | .337        | .035        | .483        | .013       |            | .029       |
|                 | <i>n</i>            | 20      | 20        | 20      | 20       | 20          | 20          | 20          | 20              | 20              | 20              | 20         | 20         | 20         | 20          | 20          | 20          | 20         | 20         | 20         |
| %switch_H2      | Pearson Correlation | .271    | −.099     | −.205   | −.424    | −.331       | −.321       | −.305       | −.499*          | −.389           | −.580**         | .505*      | .206       | .805**     | −.219       | −.236       | −.243       | .741**     | .489*      | 1          |
|                 | Sig. (2-tailed)     | .247    | .677      | .385    | .063     | .154        | .168        | .191        | .025            | .090            | .007            | .023       | .384       | .000       | .354        | .317        | .302        | .000       | .029       |            |
|                 | <i>n</i>            | 20      | 20        | 20      | 20       | 20          | 20          | 20          | 20              | 20              | 20              | 20         | 20         | 20         | 20          | 20          | 20          | 20         | 20         | 20         |

Note. H1 = Rater 1; H2 = Rater 2; LN = Lancaster Norms. \*Correlation is significant at the .05 level (2-tailed). \*\*Correlation is significant at the .01 level (2-tailed).
